# Supplementary material for: Regulation of B-cell development and tolerance by different members of the miR-17∼92 family microRNAs
Source: PubMed Central journal article supplement (PMC4974641; doi:10.1038/ncomms12207), 2016-08-02
Supplement: ncomms12207-s1.pdf [file ncomms12207-s1.pdf]

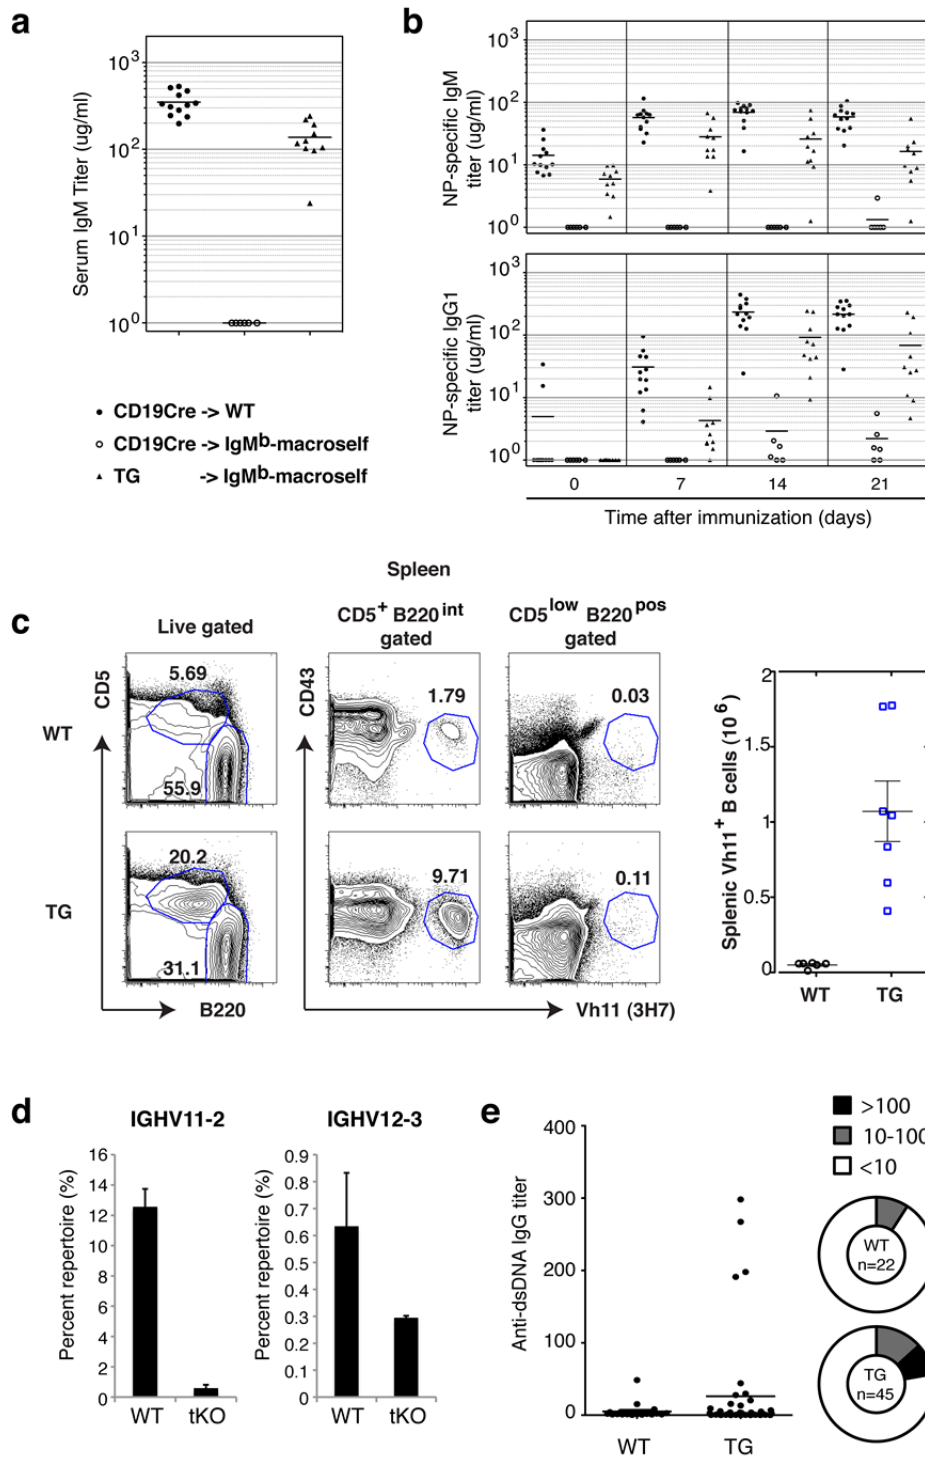

**Supplementary Figure 1 | Functional analysis of B cells in TG->IgM<sup>b</sup>-macroself chimeras and autoreactive B cells in TG mice.**

(a) Total serum IgM concentrations in WT and IgM<sup>b</sup>-macroself recipient mice were determined by ELISA at 2 months after bone marrow reconstitution. (b) Recipient mice in a were immunized with NP-CGG/alum. NP-specific IgM (upper panel) and IgG1 (lower panel) responses were assessed by NP-specific ELISA. Each symbol represents an individual mouse, and the horizontal bar indicates the mean. (c) V<sub>H</sub>11<sup>+</sup> B cells were detected by flow cytometry in the spleen of WT and TG mice. (d) IGHV11-2 and IGHV12-3 gene usage in C57BL/6J (WT) and tKO (CD19tKO or CD19-Cre;miR-

17~92<sup>fl/fl</sup>;miR-106a~363<sup>-/-</sup>;miR-106b~25<sup>-/-</sup>) mice was determined by BCR repertoire analysis of splenic B cells. B cells were activated *in vitro* to facilitate the analysis. (e) Enzyme-linked immunosorbent assay (ELISA) of serum titers of anti-double stranded DNA (anti-dsDNA) IgG antibody in WT and TG mice at terminal analysis. The serum titer of 4-month-old MRL-lpr/lpr mice was arbitrarily set as 1000. The frequencies of mice with high (>100, black), medium (10-100, grey) and low (<10, white) levels of anti-dsDNA antibodies in WT and TG groups are shown in the pie charts on the right. Data are representative of 3 (c) or 2 (d) or pooled from 2 (a,b,e) or 3 (c) independent experiments (mean ± SEM in d) with n=12 (Cre to WT), 6 (Cre to IgM<sup>b</sup>-macroself) or 10 (TG to IgM<sup>b</sup>-macroself) in a,b, n=6 (WT) or 7 (TG) in c, n=2 (WT and tKO) in d, and n=22 (WT) or 45 (TG) in e.

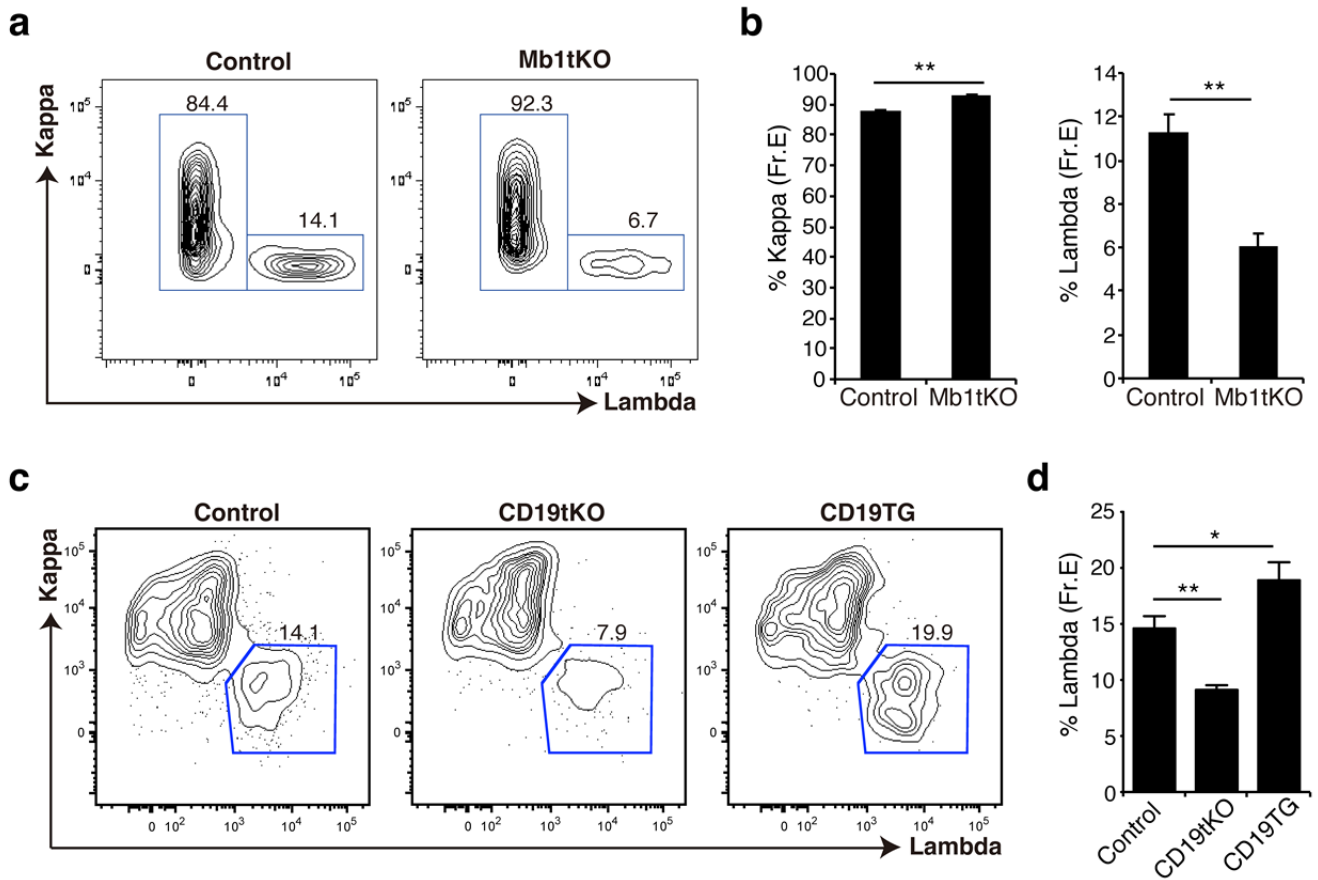

**Supplementary Figure 2 | miR-17~92 regulates receptor editing.**

(a) Representative flow cytometry plots showing kappa- and lambda-positive cells in immature B cells in the bone marrow (Fraction E) of control and Mb1tKO mice. (b) Percentages of Kappa- and lambda-positive immature B cells in the mice analyzed in a. (c) Representative FACS plots of kappa- and lambda-positive cells in immature B cells in the bone marrow of control, CD19tKO and TG (CD19TG) mice. (d) Percentages of lambda-positive immature B cells in the mice analyzed in c. \* $P < 0.05$ , \*\* $P < 0.01$  (two-tailed Student's t test). Data are representative of 2 (a) or 5 (b) or pooled from 2 (a) or 5 (b) independent experiments (mean  $\pm$  SEM in a,b) with  $n=12$  (Control and Mb1tKO) in a, and  $n=7$  (Control), 10 (tKO) or 5 (TG) in b.

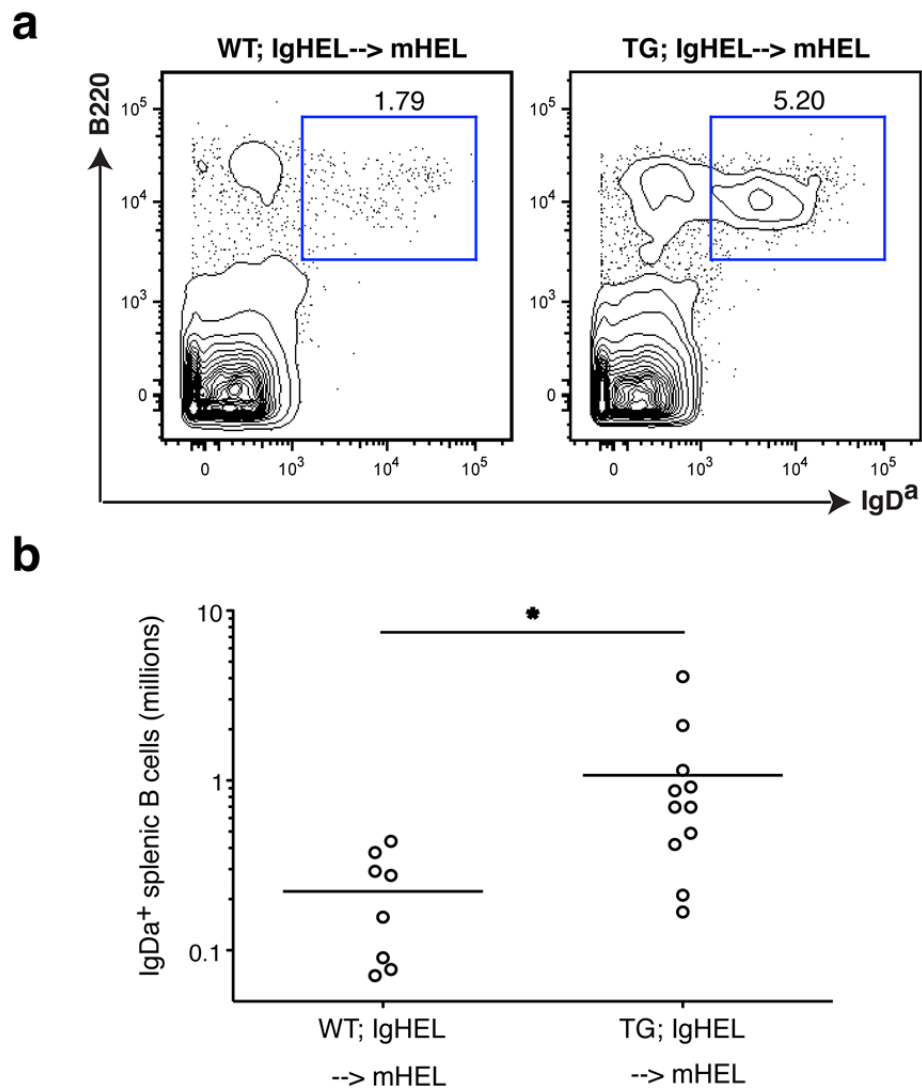

**Supplementary Figure 3 | miR-17~92 regulates B cell central tolerance in the IgHEL:mHEL model.**

(a) Representative flow cytometry plots showing splenic IgHEL (IgDa<sup>+</sup>) B cells of mHEL recipient mice reconstituted with bone marrow cells from WT;IgHEL or TG;IgHEL mice. Recipient mice were analyzed at 8 weeks after reconstitution. (b) Splenic IgHEL (IgDa<sup>+</sup>) B cell numbers in the mice analyzed in a. \* $<0.05$  (two-tailed Student's t test). Data are representative of (a) or pooled from (b) 3 independent experiments with n=8 (WT) or 11 (TG).

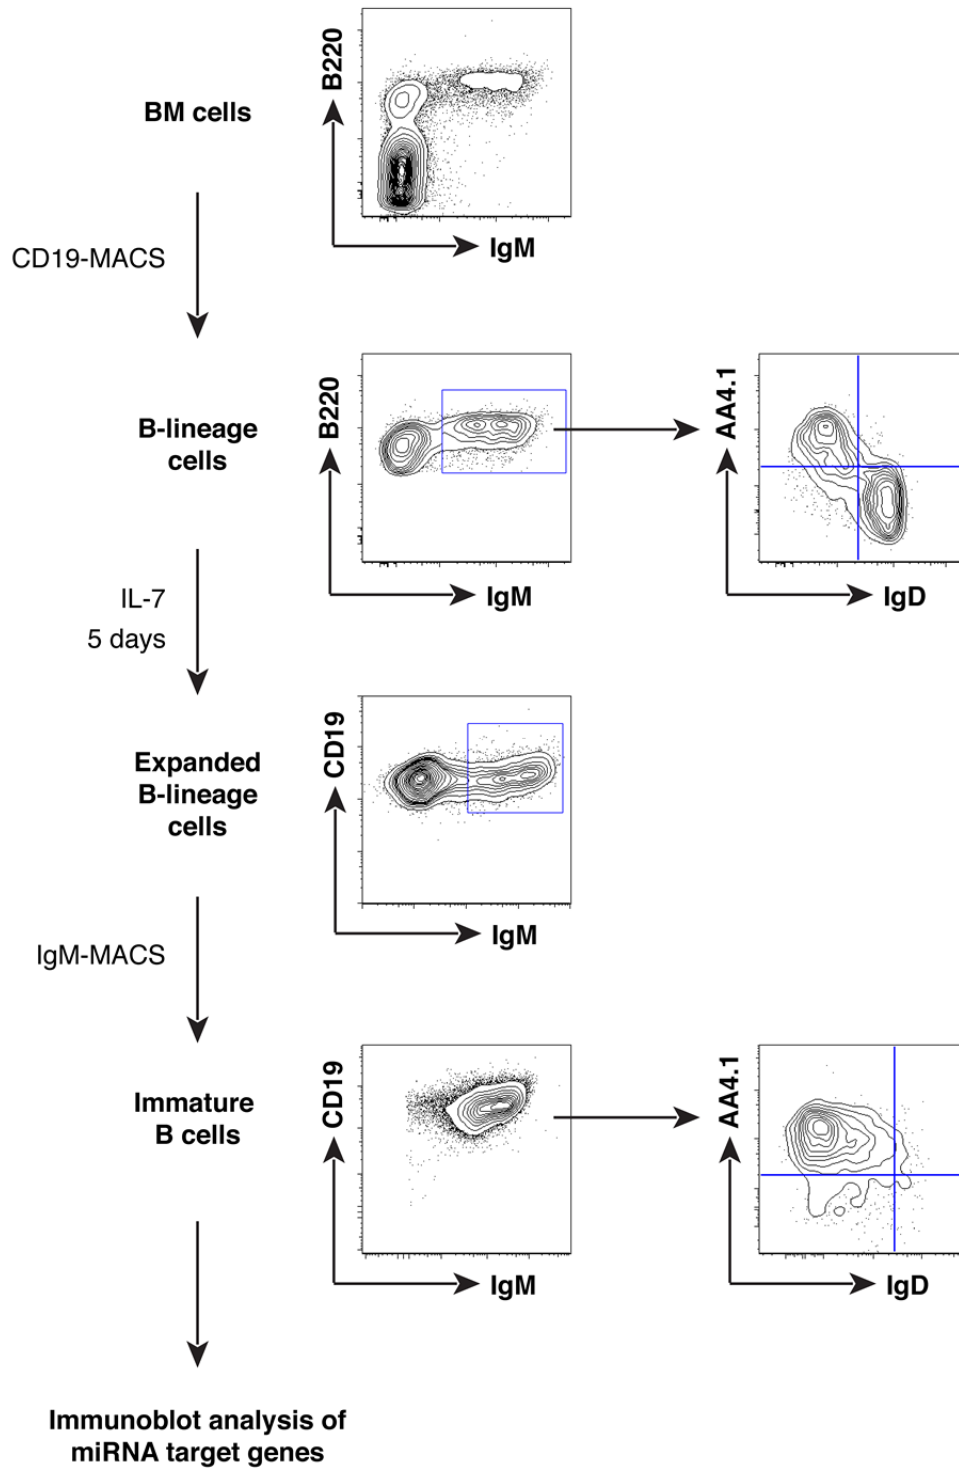

**Supplementary Figure 4 | *In vitro* culture and enrichment of immature B cells for the detection of miR-17~92 target gene expression.**

Representative flow cytometry plots of the cultured cells before and after MACS purification, showing the percentage and purity of immature B cells with a CD19<sup>+</sup>IgM<sup>+</sup>AA4.1<sup>+</sup>IgD<sup>-</sup> surface phenotype. Data are representative of 3 independent experiments.

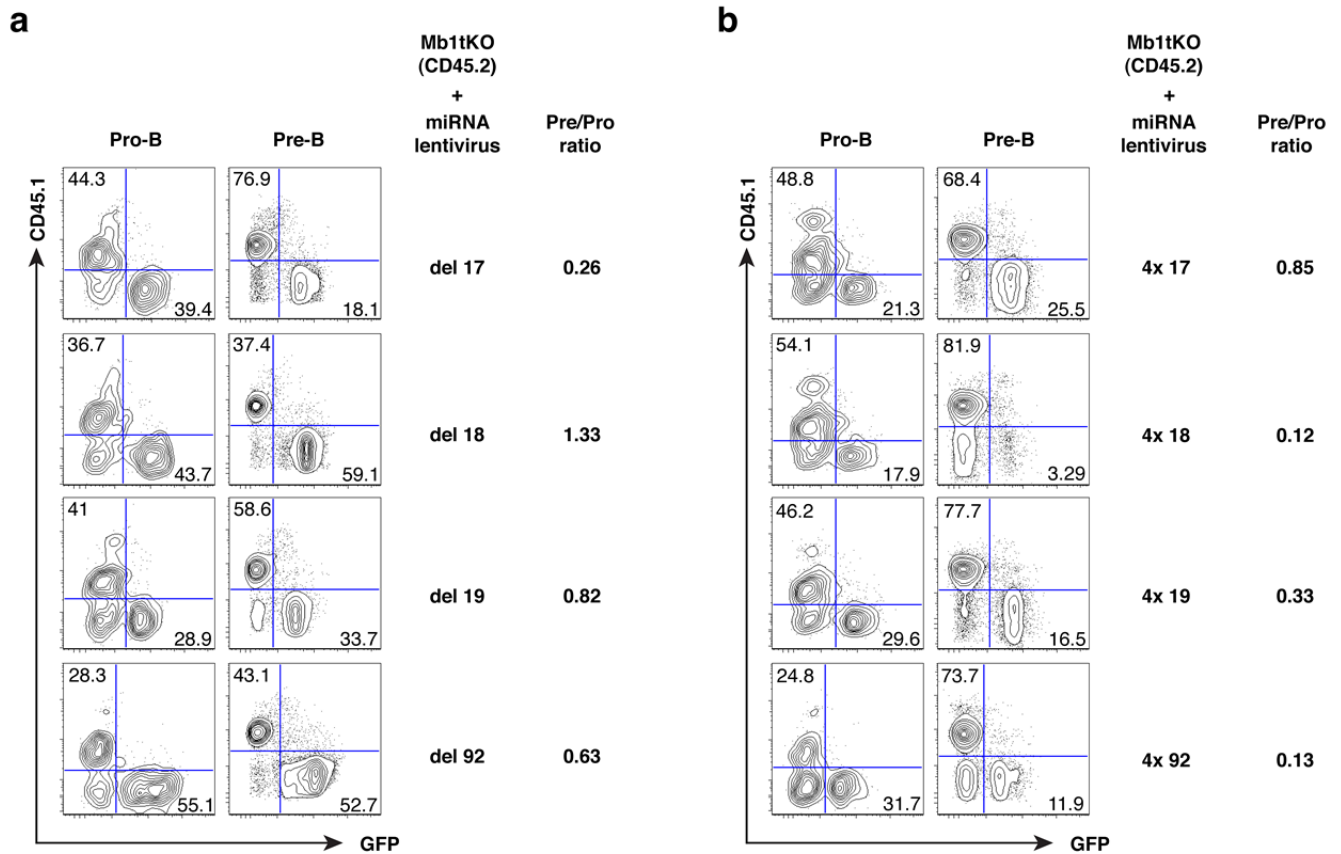

**Supplementary Figure 5 | miR-17 plays a central role in regulating the pro-B to pre-B transition.** Representative flow cytometry plots of pro- and pre-B cells of the mixed bone marrow chimeras, showing contributions from the WT-derived cells (CD45.1<sup>+</sup>) and the lentivirus-transduced cells (GFP<sup>+</sup>). HSCs from the Mb1tKO were transduced with lentivirus expressing (a) subfamily deletions, or (b) individual miRNAs of the miR-17~92 cluster, and mixed with BM cells from the congenic WT mice to generate the mixed bone marrow chimeras. Data are representative of 6 independent experiments with n=7 (del17) or 4 (del18, 19, 92) in a, and n=8 (4x17), 6 (4x18 and 4x92) or 7 (4x19) in b.

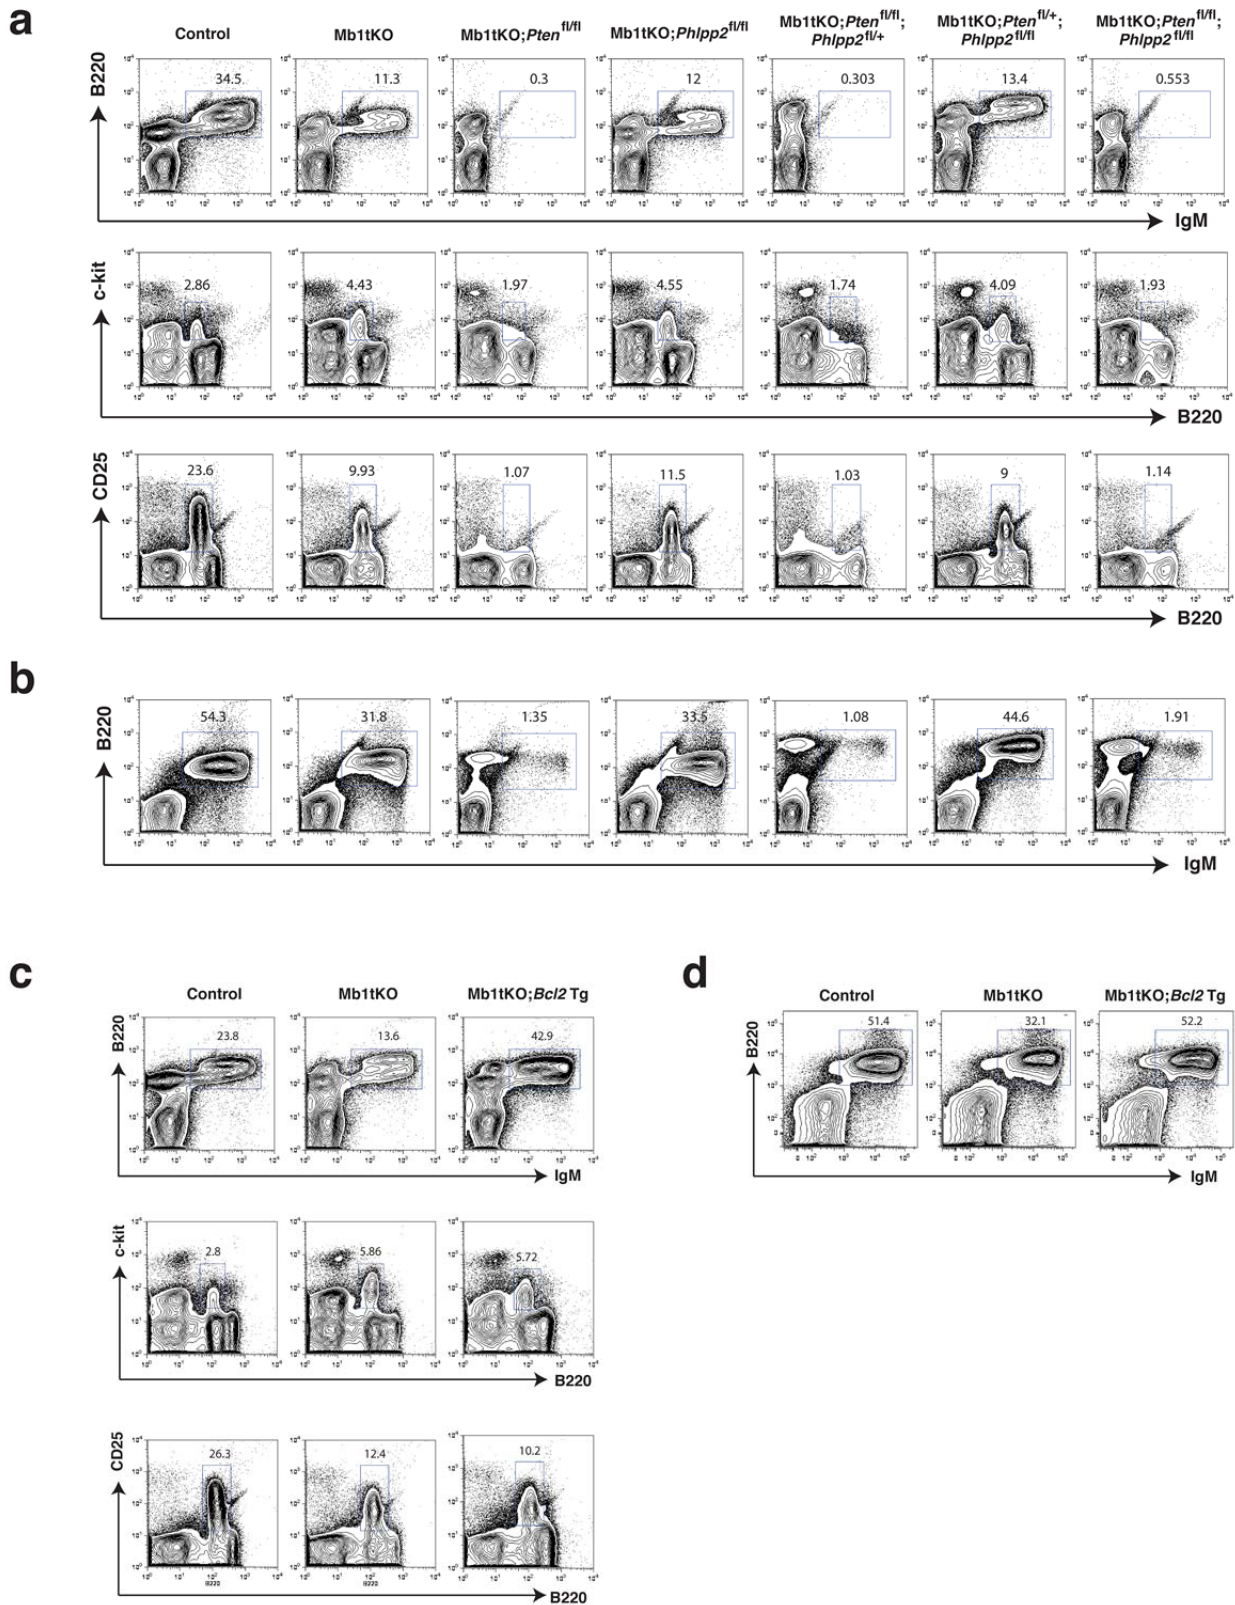

**Supplementary Figure 6 | *Pten* and *Phlpp2* ablation or transgenic *Bcl2* expression does not rescue early B cell development in mice deficient of the miR-17~92 miRNA family.**

Representative flow cytometry plots of (a,c) bone marrow IgM<sup>+</sup> B cells (B220<sup>+</sup>IgM<sup>+</sup>), pro-B cells (B220<sup>int</sup>c-kit<sup>+</sup>) and pre-B cells (B220<sup>int</sup>CD25<sup>+</sup>), and (b,d) splenic IgM<sup>+</sup> B cells (B220<sup>+</sup>IgM<sup>+</sup>) in mice of

indicated genotypes. Data are representative of 8 (**a,b**) or 2 (**c,d**) independent experiments with n=5 (Control, Mb1tKO and Mb1tKO;Pten<sup>fl/+</sup>Phlpp2<sup>fl/fl</sup>), 7 (Mb1tKO;Pten<sup>fl/fl</sup>), 8 (Mb1tKO;Phlpp2<sup>fl/fl</sup>), 6 (Mb1tKO;Pten<sup>fl/fl</sup>Phlpp2<sup>fl/+</sup>) or 3 (Mb1tKO;Pten<sup>fl/fl</sup>Phlpp2<sup>fl/fl</sup>) in **a** (IgM-B220 and CD25-B220) and **b**, n=4 (Control and Mb1tKO), 5 (Mb1tKO;Pten<sup>fl/fl</sup>, Mb1tKO;Pten<sup>fl/+</sup>Phlpp2<sup>fl/fl</sup> and Mb1tKO;Pten<sup>fl/fl</sup>Phlpp2<sup>fl/+</sup>), 6 (Mb1tKO;Phlpp2<sup>fl/fl</sup>) or 3 (Mb1tKO;Pten<sup>fl/fl</sup>Phlpp2<sup>fl/fl</sup>) in **a** (c-kit-B220), and n=5 (Control, Mb1tKO and Mb1tKO;Bcl2Tg) in **c,d**.



**a**

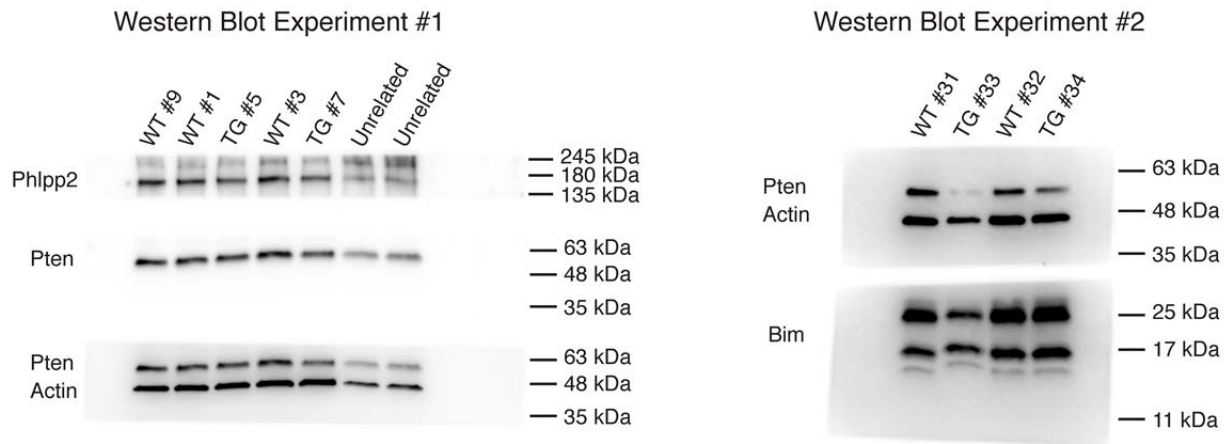

**b**

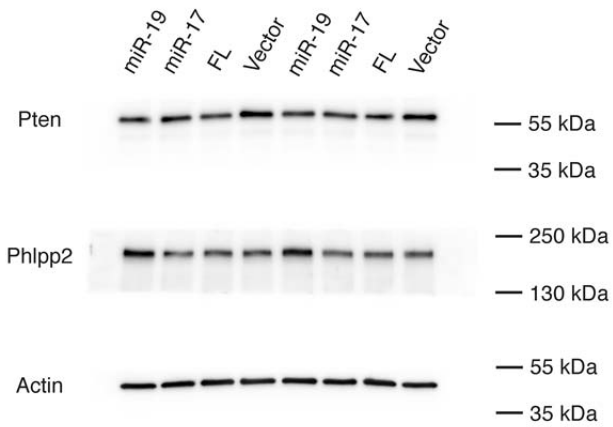

**Supplementary Figure 7 | Full-size scans of all Western blots shown in figures, with labeled lanes and molecular weight markers.**

Full size scan of the Western blots corresponding to Figure 3a (a) and Figure 3c (b) indicating the molecular weights of Pten, Phlpp2, Bim and actin.
